# Supplementary material for: Enhanced Field Emission and Low-Pressure Hydrogen Sensing Properties from Al–N-Co-Doped ZnO Nanorods
Source: MDPI journal article supplement (doi:10.3390/nano14100863), 2024-05-16
Supplement: s1 [file s1]

# Supplementary Material

## Enhanced Field Emission and Low-Pressure Hydrogen Sensing Properties from Al–N–Co-Doped ZnO Nanorods

Youqing Tu, Weijin Qian\*, Mingliang Dong, Guitao Chen, Youlong Quan, Weijun Huang and Changkun Dong\*

Wenzhou Key Lab of Micro-Nano Optoelectronic Devices, Wenzhou University, Wenzhou 325035, China; YookingTu@163.com (Y.T.); dml13946319580@126.com (M.D.); 13124983550@163.com (G.C.); 17377260603@163.com (Y.Q.); 18857757816@163.com (W.H.); \*Correspondence: weijinqian@wzu.edu.cn (W.Q.), dck@wzu.edu.cn (C.D.); Tel.: +86-577-86689067 (C.D.)

### Index

- SM-1.** The schematic diagram of field emission hydrogen sensing test system
- SM-2.** Comparison of the diameter distributions of the undoped and the doped ZnO nanorods
- SM-3.** The variation curves between the sensing current and the time
- SM-4.** Pressure sensing performances for all samples with six tests on the same sample
- SM-5.** The reproducible data on six samples of sensor performances
- SM-6.** Comparison of the low pressure sensing performances

**SM-1.** The schematic diagram of field emission hydrogen sensing test system

We firstly prepared the undoped, Al doped, N doped, and Al-N co-doped ZnO samples. Then all test samples were placed in a high vacuum field emission testing system. The field emission was carried in a bipolar structure with the ZnO samples as the cathode and the stainless steel as the anode (Figure S1).

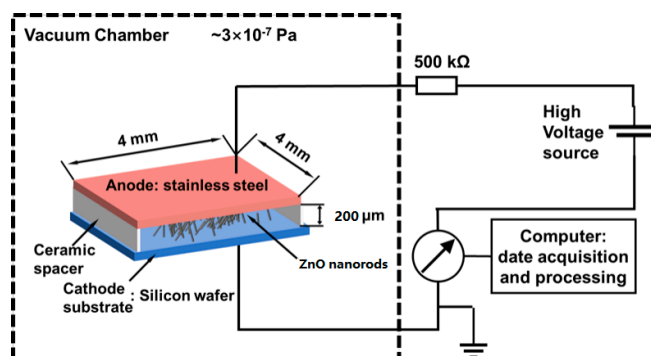

**Figure S1.** The schematic diagram of field emission hydrogen sensing test system

**SM-2.** Comparison of the diameter distributions of the undoped and the doped ZnO nanorods

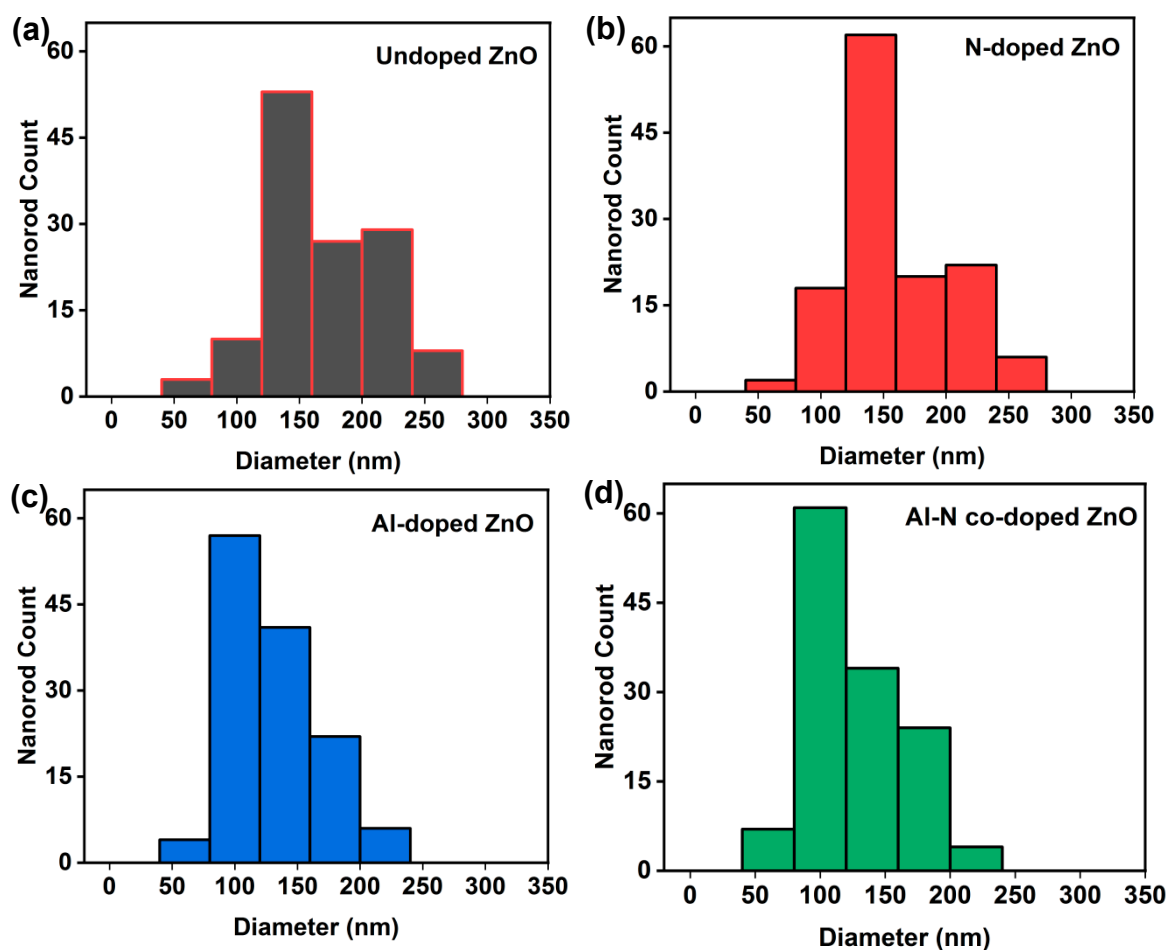

**Figure S2.** The diameter distributions of the undoped and the doped ZnO nanorods

The diameters of the undoped and N-doped ZnO nanorods are mainly in the range of 120 to 250 nm, While the diameter of Al doped and Al-N co-doped ZnO nanorods are mainly from 100 to 200 nm. For the samples of small diameters (less than 120 nm), the undoped and N-doped ZnO nanorods account for 10.0 and 15.4 percentages, respectively, while Al-doped and Al-N co-doped nanorods account for 46.9 and 54.6 percentages, respectively, suggesting larger aspect ratios.

**SM-3.** The variation curves between the sensing current and the time.

Taking Al-N co-doped ZnO nanorods for example, the field emission currents increased during a 5 min test period under a constant emission voltage, and the increase rates rose with increasing the pressure from  $3 \times 10^{-7}$  to  $5 \times 10^{-4}$  Pa. The variation curves between the sensing current and the time were firstly obtained by computer, as shown in Figure S3, then the normalized average current  $I_N$  was used to obtain the pressure sensing performance curves.

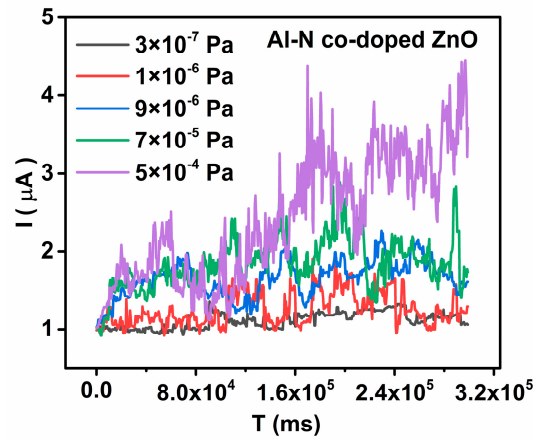

**Figure S3.** The variation curves between the sensing current and the time under different partial pressure of hydrogen for Al-N co-doped ZnO nanorods.

**SM-4.** Pressure sensing performances for all samples with six tests on the same sample

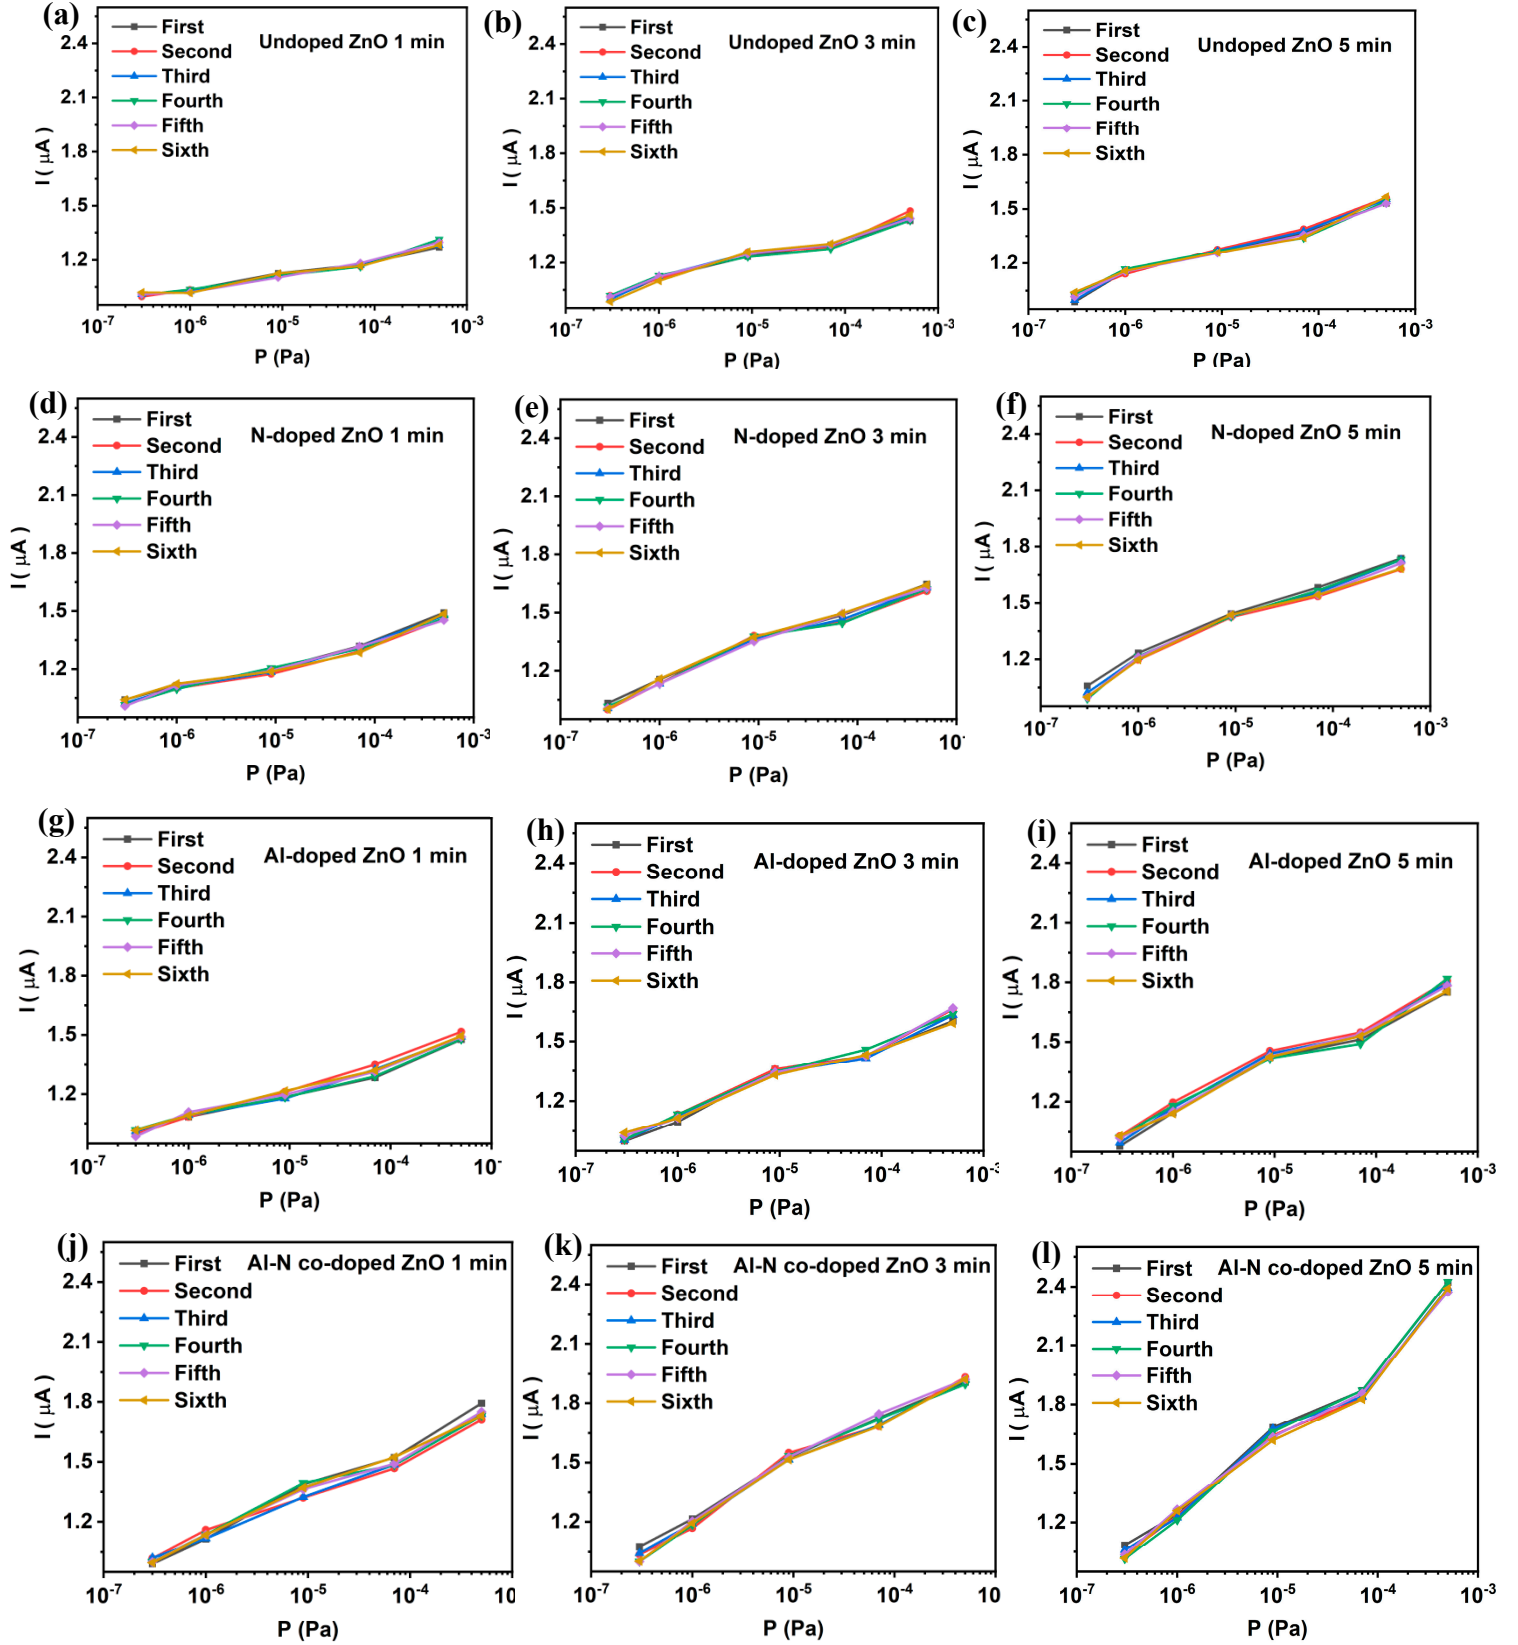

**Figure S4.** Pressure sensing performances for all samples with six tests on the same sample. (a-c) undoped; (d-f) N-doped; (g-i) Al-doped and (j-l) Al-N co-doped.

Multiple sensing tests on the same sample show good repeatability as shown in the Figure S4.

**SM-5.** The reproducible data on six samples of sensor performances.

The pressure sensing curves of six different samples were obtained, as shown in Figure S4, showing good repeatability for these samples.

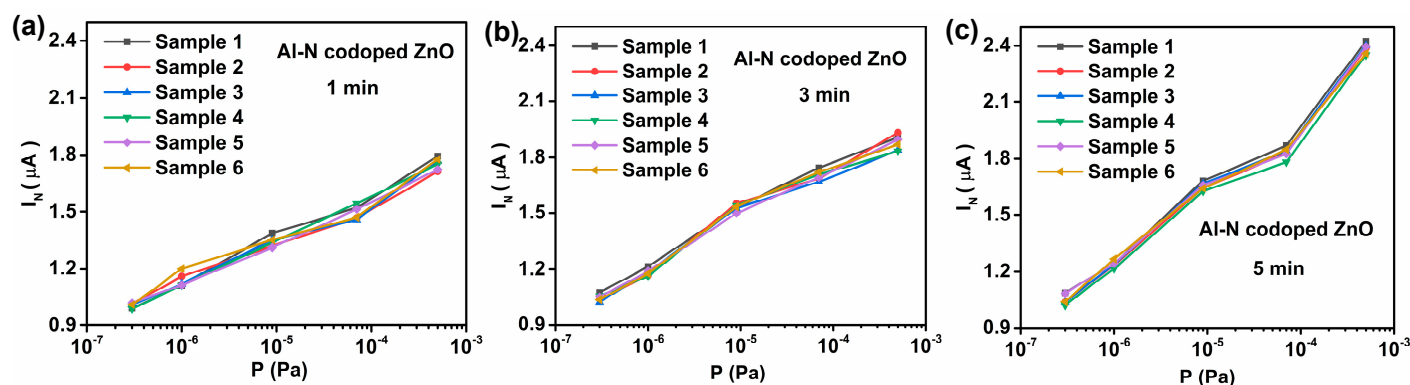

**Figure S5.** The reproducible pressure sensing curves for six different Al-N co-doped ZnO samples under different test time. (a) 1min; (b) 3min and (c) 5min.

**SM-6. Comparison of the low pressure sensing performances**

**Table S1** Comparison of the low pressure sensing performances

| Materials                  | Application                      | Detection range          | Response time | References |
|----------------------------|----------------------------------|--------------------------|---------------|------------|
| Polymers                   | Electronic skin                  | $10^{-2}$ - $10^1$ Pa    | < 10 ms       | [47]       |
| NM-based vertical junction | Variable-area transport junction | $10^{-2}$ - $10^1$ Pa    | ~ 80 ms       | [48]       |
| AuPd alloy                 | Nanoelectromechanical systems    | $10^{-3}$ - $10^{-2}$ Pa | 6.66 MHz      | [3]        |
| PdO nanoparticles          | Plasma optical hydrogen sensor   | 1 mbar~1 bar             | 5 s           | [6]        |
| ZnO nanorods               | Vacuum electronic device         | $10^{-7}$ - $10^{-4}$ Pa | 60 s          | This work  |
